# Supplementary material
Source: Research Square preprint supplement (doi:10.21203/rs.3.rs-9637957/v1)
Supplement: Supplementary file 1 [file 0475d54193c860fb7d3e9d60.docx]

Table 4. Analysis of variance for mesocotyl length

| **Source** | **Degree of freedom** | **Sum of squares** | **Mean of square** | **F** | **p** |
| --- | --- | --- | --- | --- | --- |
| Location | 2 | 2.298 | 1.149 | 6.309 | 0.0001 |
| Inter-familial | 118 | 82.935 | 0.703 | 3.860 | 0.005 |
| Location×familial | 236 | 53.086 | 0.225 | 1.235 | 0.005 |
| Error | 356 | 64.827 | 0.182 |  |  |

Note：“p=0.005”Distinction at 0.05 probability level；“p=0.0001”Extremely distinction at 0.01 probability level

Table 5. Analysis of variance for coleoptile length

| **Source** | **Degree of freedom** | **Sum of squares** | **Mean of square** | **F** | **p** |
| --- | --- | --- | --- | --- | --- |
| Location | 2 | 0.466 | 0.233 | 157.554 | 0.0001 |
| Inter-familial | 118 | 23.886 | 0.202 | 136.920 | 0.0001 |
| Location×familial | 236 | 4.738 | 0.200 | 13.580 | 0.0001 |
| Error | 356 | 0.526 | 0.001 |  |  |

Note：“p=0.005”Distinction at 0.05 probability level；“p=0.0001”Extremely distinction at 0.01 probability level
