# Supplementary material
Source: Research Square preprint supplement (doi:10.21203/rs.3.rs-9637957/v1)
Supplement: Supplementary file 2 [file 26bd2e03370d574a13abe620.docx]

Table1 mesocotyl

| **Traits** | **Population Number** | **Average** | **SD** | **CV** | **Skewness** | **Kurtosis** | **W** |
| --- | --- | --- | --- | --- | --- | --- | --- |
| Glasshouse | 119 | 2.2684 | 0.3032 | 7.48 | 0.221 | 0.488 | 0.716 |
| Huaxi | 119 | 2.3368 | 0.3487 | 6.70 | 0.368 | 0.017 | 0.251 |
| Gaofeng | 119 | 2.4073 | 0.6018 | 4.00 | 0.383 | 0.221 | 0.234 |

Table 2 coleoptile

| **Traits** | **Population Number** | **Average** | **SD** | **CV** | **Skewness** | **Kurtosis** | **W** |
| --- | --- | --- | --- | --- | --- | --- | --- |
| Glasshouse | 119 | 2.7885 | 0.1932 | 14.43 | 0.076 | -0.392 | 0.992 |
| Huaxi | 119 | 2.7373 | 0.1586 | 17.26 | 0.120 | -0.591 | 0.986 |
| Gaofeng | 119 | 2.7318 | 0.2148 | 12.72 | 0.360 | 0.404 | 0.985 |
