# Supplementary material
Source: Research Square preprint supplement (doi:10.21203/rs.3.rs-9637957/v1)
Supplement: Supplementary file 3 [file 5e327f46afa30ad8d4a0dabd.docx]

Table 3 Analysis of the significant differences of the ability to emerge through the soil between parents

| **Treated** | **glasshouse** | | **Huaxi** | | **Gaofeng** | |
| --- | --- | --- | --- | --- | --- | --- |
| **Traits/Parents** | **T32** | **J51** | **T32** | **J51** | **T32** | **J51** |
| Emergence Rate（%） | 60 | 90 | 50 | 90 | 60 | 90 |
| Mesocotyl Length（cm） | 0.9 | 1.92** | 1.67 | 2.85** | 1.88 | 3.5** |
| Coleoptile Length（cm） | 2.13 | 3.07** | 3.27 | 4.17** | 2.52 | 3.83** |

Note：“*”Distinction at 0.05 probability level；“**”Extremely distinction at 0.01 probability level
