# Supplementary material
Source: Research Square preprint supplement (doi:10.21203/rs.3.rs-9637957/v1)
Supplement: Supplementary file 4 [file b15c4c01845af8cf9710eead.docx]

Table 9. Joint QTL analysis for coleoptile length across three environments.

| **Chr** | **QTL name** | **Bins** | **Interval markers** | **Position** | **LOD** | **PVE** | **Add** | **Dom** | **Gene action** |
| --- | --- | --- | --- | --- | --- | --- | --- | --- | --- |
| 1 | JACOL1a | 1.04-1.05 | umc1144-dupssr26 | 11 | 4.448 | 2.105 | 0.056 | 0.025 | PD |
| 1 | JACOL1b | 1.05 | dupssr26-umc2232 | 30 | 6.234 | 2.949 | 0.068 | 0.027 | PD |
| 3 | JACOL3a | 3.04 | mmc0312- umc2262 | 109 | 5.777 | 2.870 | 0.057 | 0.056 | D |
| 3 | JACOL3b | 3.04 | umc2262- umc2033 | 110 | 11.696 | 9.686 | 0.086 | 0.029 | PD |
| 4 | JACOL4a | 4.09-4.11 | umc1101- bnlg1337 | 157 | 5.741 | 2.758 | 0.058 | -0.036 | PD |
| 6 | JACOL6a | 6.01-6.02 | bnlg2191 -umc2313 | 67 | 3.649 | 1.701 | 0.001 | -0.074 | PD |
| 6 | JACOL6b | 6.01 | umc2312- umc1753 | 74 | 3.333 | 1.538 | 0.006 | -0.066 | OD |
| 6 | JACOL6c | 6.00 | umc1883- phi126 | 77 | 3.077 | 1.428 | 0.011 | -0.060 | OD |
| 6 | JACOL6d | 6.00 | phi126- bnlg161 | 80 | 3.100 | 1.461 | 0.020 | -0.061 | OD |
| 7 | JACOL7a | 7.03-7.04 | umc1710-umc1301 | 97 | 5.212 | 2.384 | 0.006 | 0.089 | OD |
| 7 | JACOL7b | 7.03-7.04 | phi114-bnlg1666 | 98 | 4.285 | 1.974 | 0.159 | 0.077 | PD |
| 7 | JACOL7c | 7.04 | bnlg1666-umc1944 | 104 | 3.673 | 1.754 | 0.024 | 0.065 | OD |
| 8 | JACOL8a | 8.05-8.06 | bnlg1607-bnlg2181 | 46 | 3.896 | 1.789 | 0.040 | 0.059 | OD |
| 8 | JACOL8b | 8.05 | bnlg2181-bnlg1812 | 51 | 3.467 | 1.578 | 0.047 | 0.049 | D |
| 8 | JACOL8c | 8.05-8.08 | umc1130-bnlg1056 | 57 | 3.896 | 1.775 | 0.033 | 0.061 | OD |
| 9 | JACOL9a | 9.00-9.01 | bnlg1272a-phi033 | 0 | 2.903 | 1.327 | -0.044 | -0.001 | A |
| 9 | JACOL9b | 9.05-9.06 | umc2338-bnlg1270 | 80 | 2.948 | 1.402 | -0.039 | 0.032 | PD |
| 9 | JACOL9c | 9.05-9.06 | umc1657-umc2346 | 93 | 2.837 | 1.311 | -0.051 | -0.010 | A |

Table 10. Joint QTL analysis for mesocotyl length across three environments.

| **Chr** | **QTL name** | **Bins** | **Interval markers** | **Position** | **LOD** | **PVE** | **Add** | **Dom** | **Gene action** |
| --- | --- | --- | --- | --- | --- | --- | --- | --- | --- |
| 1 | JAMES1a | 1.02-1.04 | bnlg1007-umc1144 | 11 | 2.501 | 2.934 | -0.062 | 0.012 | PD |
| 1 | JAMES1b | 1.05 | dupssr26-umc2232 | 30 | 2.260 | 2.206 | -0.041 | 0.090 | OD |
| 1 | JAMES1c | 1.05-1.06 | umc2232- umc1590 | 72 | 3.110 | 3.87 | -0.081 | 0.007 | A |
| 1 | JAMES1d | 1.07 | umc1278- umc1715 | 123 | 2.388 | 2.355 | 0.017 | -0.132 | OD |
| 1 | JAMES1e | 1.1-1.11 | bnlg1347a-umc1538a | 132 | 3.158 | 3.291 | 0.040 | -0.067 | OD |
| 2 | JAMES2a | 2.07 | umc2205 -umc1042 | 55 | 2.483 | 1.701 | 0.001 | -0.074 | PD |
| 2 | JAMES2b | 2.07-2.08 | umc1464- umc1497 | 56 | 3.200 | 1.538 | 0.006 | -0.066 | OD |
| 2 | JAMES2c | 2.07-2.08 | umc1497-bnlg1329 | 66 | 3.213 | 1.428 | 0.011 | -0.060 | OD |
| 2 | JAMES2d | 2.03-2.06 | umc1065- umc1555 | 101 | 2.402 | 2.325 | -0.080 | -0.032 | PD |
| 3 | JAMES3a | 3.07-3.09 | umc1052-umc2050 | 18 | 10.410 | 13.562 | 0.163 | -0.049 | PD |
| 3 | JAMES3b | 3.07-3.08 | umc2050-umc2081 | 33 | 4.116 | 4.923 | 0.129 | 0.041 | PD |
| 3 | JAMES3c | 3.04-3.06 | bnlg1449-umc2002 | 104 | 2.009 | 2.055 | -0.045 | 0.105 | OD |
| 3 | JAMES3d | 3.04 | mmc0312-umc2262 | 109 | 3.311 | 1.942 | -0.073 | 0.089 | OD |
| 3 | JAMES3e | 3.04 | umc2262-umc2033 | 136 | 3.467 | 2.239 | 0.047 | 0.049 | D |
| 4 | JAMES4a | 4.03-4.04 | umc2176-bnlg490 | 54 | 2.292 | 2.169 | -0.076 | 0.083 | OD |
| 4 | JAMES4b | 4.04-4.05 | bnlg490-bnlg1217 | 62 | 3.113 | 1.570 | -0.076 | 0.089 | OD |
| 4 | JAMES4c | 4.10-4.11 | bnlg1890-bnlg1917 | 186 | 2.655 | 1.402 | 0.034 | 0.006 | A |
| 5 | JAMES5a | 5.00-5.01 | umc2291-umc2036 | 0 | 2.159 | 2.073 | 0.075 | 0.068 | A |
| 6 | JAMES6a | 6.02-6.03 | umc1887-bnlg2191 | 51 | 2.086 | 2.445 | 0.062 | 0.005 | A |
| 7 | JAMES7a | 7.00-7.01 | bnlg1367-umc1159 | 0 | 4.829 | 5.428 | -0.013 | 0.012 | A |
| 8 | JAMES8a | 8.05-8.06 | bnlg1607-bnlg2181 | 1 | 2.629 | 2.988 | -0.082 | -0.021 | PD |
| 8 | JAMES8b | 8.06-8.07 | bnlg1823-bnlg1607 | 46 | 2.640 | 1.180 | -0.069 | 0.073 | D |
| 8 | JAMES8c | 8.03 | umc1741-umc1236 | 71 | 2.649 | 1.704 | -0.082 | -0.043 | PD |
| 8 | JAMES8d | 8.03 | umc1236-umc1034 | 81 | 2.287 | 1.958 | -0.090 | -0.046 | PD |
| 9 | JAMES9a | 9.05-9.06 | umc2338-bnlg1270 | 80 | 2.145 | 1.183 | -0.036 | 0.01 | PD |
| 9 | JAMES9b | 9.05-9.06 | umc1657-umc2346 | 93 | 2.219 | 1.332 | -0.030 | 0.004 | A |
