# Supplementary material
Source: Research Square preprint supplement (doi:10.21203/rs.3.rs-9637957/v1)
Supplement: Supplementary file 5 [file b2deff34c3a09027536392bd.docx]

Table 7. QTL analysis for coleoptile length across three environments.

| **Site** | **Chr** | **QTL name** | **Bins** | **Interval markers** | **Position** | **LOD score** | **PVE** | **Add** | **Dom** | **Gene action** |
| --- | --- | --- | --- | --- | --- | --- | --- | --- | --- | --- |
| WS | 1 | WSCOL1a | 1.04-1.05 | umc1144-dupssr26 | 30 | 2.613 | 5.685 | 0.0817 | 0.0487 | PD |
| WS | 3 | WSCOL3a | 3.04 | umc2262-umc2033 | 111 | 3.266 | 10.059 | 0.0733 | 0.0353 | PD |
| WS | 6 | WSCOL6a | 6.02-6.03 | umc1887-bnlg2191 | 44 | 2.043 | 6.681 | -0.013 | -0.129 | OD |
| WS | 8 | WSCOL8a | 8.05-8.06 | bnlg1607-bnlg2181 | 41 | 2.314 | 6.397 | 0.054 | 0.1058 | OD |
| HX | 3 | HXCOL3a | 3.04 | umc2262-umc2033 | 111 | 3.577 | 10.971 | 0.095 | 0.027 | PD |
| HX | 4 | HXCOL4a | 4.09-4.11 | umc1101-bnlg1337 | 160 | 3.309 | 10.571 | 0.081 | -0.056 | PD |
| HX | 7 | HXCOL7a | 7.04 | bnlg1666-umc1944 | 118 | 2.613 | 7.876 | 0.090 | 0.024 | PD |
| GF | 1 | GFCOL1a | 1.04-1.05 | umc1144-dupssr26 | 30 | 2.836 | 7.080 | 0.079 | 0.024 | PD |
| GF | 3 | GFCOL3a | 3.04 | umc2262-umc2033 | 116 | 4.097 | 12.251 | 0.097 | 0.033 | PD |

Table 8. QTL analysis for mesocotyl length across three environments.

| **Site** | **Chr** | **QTL name** | **Bins** | **Interval markers** | **Position** | **LOD score** | **PVE** | **Add** | **Dom** | **Gene action** |
| --- | --- | --- | --- | --- | --- | --- | --- | --- | --- | --- |
| WS | 1 | WSMES1a | 1.1-1.11 | bnlg1347a-umc1538a | 135 | 1.751 | 4.284 | -0.107 | -0.067 | PD |
| WS | 3 | WSMES3a | 3.07-3.09 | umc1052-umc2050 | 15 | 3.778 | 10.466 | 0.108 | -0.108 | D |
| WS | 4 | WSMES4a | 4.10-4.11 | bnlg1890-bnlg1917 | 186 | 2.526 | 5.783 | 0.140 | 0.005 | PD |
| WS | 8 | WSMES8a | 8.05-8.06 | bnlg1607-bnlg2181 | 46 | 2.172 | 4.443 | -0.040 | 0.153 | OD |
| WS | 9 | WSMES9a | 9.05-9.06 | umc1657-umc2346 | 103 | 2.346 | 6.617 | -0.128 | -0.091 | PD |
| HX | 1 | HXMES1a | 1.09-1.10 | umc1715-bnlg1347a | 126 | 1.521 | 5.598 | 0.008 | -0.191 | OD |
| HX | 3 | HXMES3a | 3.07-3.09 | umc1052-umc2050 | 16 | 4.825 | 15.516 | 0.211 | -0.043 | A |
| HX | 7 | HXMES7a | 7.00-7.01 | bnlg1367-umc1159 | 8 | 2.284 | 7.187 | 0.081 | -0.056 | PD |
| GF | 3 | GFMES3a | 3.07-3.09 | umc1052-umc2050 | 16 | 5.021 | 16.157 | 0.288 | -0.033 | A |
| GF | 7 | GFMES7a | 7.00-7.01 | bnlg1367-umc1159 | 8 | 2.253 | 9.397 | -0.281 | 0.111 | PD |
