# Supplementary material
Source: Research Square preprint supplement (doi:10.21203/rs.3.rs-9637957/v1)
Supplement: Supplementary file 6 [file e61c6b67269560debd6983e7.docx]

| Table 6. Summary of the genetic linkage map constructed in the (T32 × J51) F₂ population | | | |
| --- | --- | --- | --- |
| **Chr** | **Makers** | **Cover the chromosome** | **Average map distance(cM)** |
| 1 | 17 | 202.619 | 11.919 |
| 2 | 17 | 179.507 | 10.559 |
| 3 | 14 | 136.646 | 9.760 |
| 4 | 14 | 186.891 | 13.349 |
| 5 | 17 | 145.448 | 8.556 |
| 6 | 14 | 81.451 | 5.818 |
| 7 | 14 | 118.980 | 8.500 |
| 8 | 14 | 81.354 | 5.811 |
| 9 | 13 | 123.483 | 9.499 |
| 10 | 18 | 101.042 | 5.613 |
